# Supplementary material for: Electric field induced tuning of molecular conformation to acquire spintronics property in biphenyl systems
Source: Royal Society of Chemistry journal article supplement (doi:10.1039/c3ra41706a), 2013-01-01
Supplement: c3ra41706a.pdf [file c3ra41706a.pdf]

## Electronic supplementary information

### Electric Field Induced Tuning of Molecular Conformation to Acquire Spintronics Property in Biphenyl Systems

Suranjan Shil and Anirban Misra \*

Department of Chemistry, University of North Bengal, Raja Rammohunpur, Darjeeling  
734013, West Bengal, India

\*Email [anirbanmisra@yahoo.com](mailto:anirbanmisra@yahoo.com)

#### Optimized Coordinate of Biphenyl

$E_{\parallel} = 0.00$  a.u.

0 1

|   |             |             |             |
|---|-------------|-------------|-------------|
| C | -0.74356500 | 0.00000100  | 0.00000000  |
| C | -1.46641600 | 1.13206200  | 0.41656800  |
| C | -2.86235200 | 1.13289400  | 0.41592000  |
| C | -3.56719600 | -0.00000100 | 0.00000000  |
| C | -2.86235100 | -1.13289500 | -0.41592100 |
| C | -1.46641500 | -1.13206100 | -0.41656800 |
| C | 0.74356500  | 0.00000100  | 0.00000000  |
| C | 1.46641600  | 1.13206200  | -0.41656700 |
| C | 2.86235200  | 1.13289400  | -0.41592100 |
| C | 3.56719600  | -0.00000100 | -0.00000100 |
| C | 2.86235100  | -1.13289500 | 0.41592100  |
| C | 1.46641500  | -1.13206100 | 0.41656900  |

|   |             |             |             |
|---|-------------|-------------|-------------|
| H | -0.92997000 | 2.00919500  | 0.76662200  |
| H | -3.39936700 | 2.01628800  | 0.74998700  |
| H | -4.65331000 | -0.00000200 | 0.00000100  |
| H | -3.39936500 | -2.01628900 | -0.74998800 |
| H | -0.92996800 | -2.00919300 | -0.76662400 |
| H | 0.92997000  | 2.00919600  | -0.76662000 |
| H | 3.39936700  | 2.01628800  | -0.74998800 |
| H | 4.65331000  | -0.00000200 | -0.00000200 |
| H | 3.39936500  | -2.01628900 | 0.74998900  |
| H | 0.92996800  | -2.00919300 | 0.76662400  |

$E_{\parallel} = 0.0015$  a.u.

0 1

|   |             |             |             |
|---|-------------|-------------|-------------|
| C | -0.74414000 | -0.00000100 | 0.00000000  |
| C | -1.46649300 | -1.13265200 | -0.41568600 |
| C | -2.86232900 | -1.13313500 | -0.41563100 |
| C | -3.56681300 | 0.00000000  | 0.00000000  |
| C | -2.86232800 | 1.13313600  | 0.41563100  |
| C | -1.46649200 | 1.13265200  | 0.41568600  |
| C | 0.74291000  | -0.00000100 | 0.00000000  |
| C | 1.46652800  | -1.13190600 | 0.41626500  |
| C | 2.86253900  | -1.13306800 | 0.41514600  |
| C | 3.56782000  | 0.00000000  | 0.00000000  |
| C | 2.86253800  | 1.13306800  | -0.41514600 |
| C | 1.46652800  | 1.13190600  | -0.41626500 |

|   |             |             |             |
|---|-------------|-------------|-------------|
| H | -0.93053900 | -2.01032400 | -0.76549200 |
| H | -3.39983800 | -2.01612700 | -0.74932800 |
| H | -4.65265400 | 0.00000100  | 0.00000000  |
| H | -3.39983600 | 2.01612800  | 0.74932900  |
| H | -0.93053800 | 2.01032300  | 0.76549200  |
| H | 0.92972500  | -2.00893600 | 0.76565000  |
| H | 3.39905800  | -2.01713100 | 0.74879600  |
| H | 4.65423000  | 0.00000100  | 0.00000000  |
| H | 3.39905700  | 2.01713100  | -0.74879600 |
| H | 0.92972300  | 2.00893500  | -0.76565000 |

$E_{\parallel} = 0.0030$  a.u.

0 1

|   |             |             |             |
|---|-------------|-------------|-------------|
| C | -0.74481900 | 0.00000000  | 0.00000000  |
| C | -1.46651100 | 1.13378400  | 0.41352200  |
| C | -2.86236700 | 1.13404500  | 0.41365000  |
| C | -3.56648500 | 0.00000000  | 0.00000000  |
| C | -2.86236700 | -1.13404500 | -0.41365100 |
| C | -1.46651100 | -1.13378400 | -0.41352200 |
| C | 0.74202100  | 0.00000000  | 0.00000000  |
| C | 1.46681900  | 1.13233600  | -0.41426000 |
| C | 2.86277000  | 1.13369600  | -0.41295700 |
| C | 3.56865000  | 0.00000000  | 0.00000000  |
| C | 2.86277000  | -1.13369600 | 0.41295800  |
| C | 1.46681900  | -1.13233600 | 0.41426000  |

|   |             |             |             |
|---|-------------|-------------|-------------|
| H | -0.93119900 | 2.01244400  | 0.76207700  |
| H | -3.40081100 | 2.01685600  | 0.74575200  |
| H | -4.65213900 | 0.00000000  | 0.00000000  |
| H | -3.40081100 | -2.01685600 | -0.74575300 |
| H | -0.93119900 | -2.01244400 | -0.76207700 |
| H | 0.92961600  | 2.00966600  | -0.76204500 |
| H | 3.39839500  | 2.01912000  | -0.74517300 |
| H | 4.65539200  | 0.00000000  | 0.00000000  |
| H | 3.39839500  | -2.01912000 | 0.74517400  |
| H | 0.92961600  | -2.00966600 | 0.76204500  |

$E_{\parallel} = 0.0045$  a.u.

0 1

|   |             |             |             |
|---|-------------|-------------|-------------|
| C | -0.74538300 | 0.00000100  | 0.00000000  |
| C | -1.46671600 | 1.13564000  | 0.40929300  |
| C | -2.86251700 | 1.13558400  | 0.40991700  |
| C | -3.56637800 | -0.00000100 | 0.00000000  |
| C | -2.86251500 | -1.13558500 | -0.40991700 |
| C | -1.46671500 | -1.13563900 | -0.40929300 |
| C | 0.74115000  | 0.00000100  | 0.00000000  |
| C | 1.46717200  | 1.13323400  | -0.41101000 |
| C | 2.86312100  | 1.13485600  | -0.40922500 |
| C | 3.56967100  | -0.00000100 | 0.00000000  |
| C | 2.86311900  | -1.13485800 | 0.40922600  |

|   |             |             |             |
|---|-------------|-------------|-------------|
| C | 1.46717100  | -1.13323300 | 0.41101000  |
| H | -0.93207300 | 2.01579000  | 0.75533300  |
| H | -3.40171400 | 2.01892500  | 0.73896700  |
| H | -4.65190400 | -0.00000200 | 0.00000000  |
| H | -3.40171200 | -2.01892600 | -0.73896700 |
| H | -0.93206900 | -2.01578800 | -0.75533300 |
| H | 0.92987600  | 2.01139000  | -0.75632700 |
| H | 3.39794300  | 2.02199300  | -0.73886400 |
| H | 4.65675500  | -0.00000200 | 0.00000000  |
| H | 3.39794100  | -2.02199500 | 0.73886400  |
| H | 0.92987200  | -2.01138800 | 0.75632700  |

$E_{||} = 0.0060$  a.u.

0 1

|   |             |             |             |
|---|-------------|-------------|-------------|
| C | -0.74574500 | 0.00000000  | 0.00000000  |
| C | -1.46707000 | -1.13782400 | -0.40405100 |
| C | -2.86273600 | -1.13739800 | -0.40529000 |
| C | -3.56646200 | 0.00000000  | 0.00000000  |
| C | -2.86273500 | 1.13739800  | 0.40528900  |
| C | -1.46707000 | 1.13782400  | 0.40405100  |
| C | 0.74022400  | 0.00000000  | 0.00000000  |
| C | 1.46756600  | -1.13457400 | 0.40658500  |
| C | 2.86354800  | -1.13651800 | 0.40417400  |
| C | 3.57084000  | 0.00000000  | 0.00000000  |

|   |             |             |             |
|---|-------------|-------------|-------------|
| C | 2.86354800  | 1.13651800  | -0.40417300 |
| C | 1.46756600  | 1.13457400  | -0.40658500 |
| H | -0.93313600 | -2.01976600 | -0.74699600 |
| H | -3.40250700 | -2.02159200 | -0.73070200 |
| H | -4.65186100 | 0.00000000  | 0.00000000  |
| H | -3.40250600 | 2.02159300  | 0.73070100  |
| H | -0.93313600 | 2.01976600  | 0.74699600  |
| H | 0.93011700  | -2.01385600 | 0.74844700  |
| H | 3.39785300  | -2.02561900 | 0.73017500  |
| H | 4.65836700  | 0.00000000  | 0.00000000  |
| H | 3.39785200  | 2.02561900  | -0.73017500 |
| H | 0.93011600  | 2.01385600  | -0.74844600 |

$E_{||} = 0.0075$  a.u.

0 1

|   |             |             |             |
|---|-------------|-------------|-------------|
| C | -0.74537800 | 0.00000000  | 0.00000000  |
| C | -1.46749700 | 1.13987000  | 0.39821500  |
| C | -2.86318900 | 1.13957100  | 0.39916500  |
| C | -3.56732700 | 0.00000000  | 0.00000000  |
| C | -2.86318900 | -1.13957100 | -0.39916500 |
| C | -1.46749700 | -1.13987000 | -0.39821500 |
| C | 0.74006100  | 0.00000000  | 0.00000000  |
| C | 1.46806400  | 1.13690100  | -0.40036400 |
| C | 2.86393100  | 1.13862200  | -0.39829600 |

|   |             |             |             |
|---|-------------|-------------|-------------|
| C | 3.57152200  | 0.00000000  | 0.00000000  |
| C | 2.86393100  | -1.13862200 | 0.39829600  |
| C | 1.46806400  | -1.13690100 | 0.40036400  |
| H | -0.93390600 | 2.02356700  | 0.73700700  |
| H | -3.40300800 | 2.02549500  | 0.72015100  |
| H | -4.65301400 | 0.00000000  | 0.00000000  |
| H | -3.40300800 | -2.02549500 | -0.72015100 |
| H | -0.93390600 | -2.02356700 | -0.73700700 |
| H | 0.93110600  | 2.01811000  | -0.73817600 |
| H | 3.39824300  | 2.02935900  | -0.71991500 |
| H | 4.65916700  | 0.00000000  | 0.00000000  |
| H | 3.39824300  | -2.02935900 | 0.71991500  |
| H | 0.93110600  | -2.01811000 | 0.73817600  |

$E_{||} = 0.0090$  a.u.

0 1

|   |             |             |             |
|---|-------------|-------------|-------------|
| C | 0.73808200  | -0.00000600 | -0.00003300 |
| C | 1.46881000  | 1.13869000  | -0.39357900 |
| C | 2.86466300  | 1.14092000  | -0.39056100 |
| C | 3.57379200  | -0.00000400 | 0.00002400  |
| C | 2.86464900  | -1.14093000 | 0.39057800  |
| C | 1.46879600  | -1.13870200 | 0.39353800  |
| C | -0.74660500 | 0.00000700  | -0.00003200 |
| C | -1.46790500 | 1.14340000  | 0.39009500  |

|   |             |             |             |
|---|-------------|-------------|-------------|
| C | -2.86348200 | 1.14248700  | 0.39200700  |
| C | -3.56700800 | 0.00000400  | 0.00002500  |
| C | -2.86349500 | -1.14247800 | -0.39198900 |
| C | -1.46791700 | -1.14338800 | -0.39013500 |
| H | 0.93143200  | 2.02145000  | -0.72603100 |
| H | 3.39731700  | 2.03523600  | -0.70675200 |
| H | 4.66228900  | 0.00000700  | 0.00007500  |
| H | 3.39729100  | -2.03522000 | 0.70686500  |
| H | 0.93140500  | -2.02143500 | 0.72604200  |
| H | -0.93583800 | 2.03006300  | 0.72416200  |
| H | -3.40496000 | 2.02904100  | 0.70734800  |
| H | -4.65237000 | -0.00000800 | 0.00007600  |
| H | -3.40498500 | -2.02905500 | -0.70725100 |
| H | -0.93586200 | -2.03007200 | -0.72417100 |

$E_L = 0.0015$  a.u.

0 1

|   |             |             |             |
|---|-------------|-------------|-------------|
| C | -0.74359300 | 0.00019700  | -0.00041200 |
| C | -1.46648000 | 1.13407800  | 0.41099100  |
| C | -2.86243000 | 1.13476900  | 0.41057100  |
| C | -3.56731400 | -0.00000700 | 0.00000700  |
| C | -2.86241600 | -1.13483100 | -0.41031600 |
| C | -1.46651400 | -1.13412600 | -0.41058200 |
| C | 0.74359300  | -0.00018500 | -0.00040600 |
| C | 1.46652100  | 1.13413300  | -0.41057300 |



|   |             |             |             |
|---|-------------|-------------|-------------|
| C | 2.86242500  | 1.13482500  | -0.41031500 |
| C | 3.56731400  | -0.00000600 | 0.00000100  |
| C | 2.86242100  | -1.13477400 | 0.41057500  |
| C | 1.46647300  | -1.13407200 | 0.41099800  |
| H | -0.92991800 | 2.01262500  | 0.75756300  |
| H | -3.39964700 | 2.02009800  | 0.73961000  |
| H | -4.65348500 | 0.00002000  | -0.00089200 |
| H | -3.39932600 | -2.01977400 | -0.74041700 |
| H | -0.93040300 | -2.01265500 | -0.75750200 |
| H | 0.93041900  | 2.01267600  | -0.75746900 |
| H | 3.39933800  | 2.01976400  | -0.74042100 |
| H | 4.65348500  | -0.00004800 | -0.00091200 |
| H | 3.39963400  | -2.02010300 | 0.73962200  |
| H | 0.92990100  | -2.01261100 | 0.75757600  |

$E_L = 0.0030$  a.u.

0 1

|   |             |             |             |
|---|-------------|-------------|-------------|
| C | -0.74349000 | -0.00000100 | -0.00003200 |
| C | -1.46605800 | -1.12978500 | -0.42321000 |
| C | -2.86193600 | -1.13060900 | -0.42265500 |
| C | -3.56665700 | 0.00002400  | 0.00007600  |
| C | -2.86188300 | 1.13064600  | 0.42266400  |
| C | -1.46602300 | 1.12983300  | 0.42300400  |
| C | 0.74349000  | 0.00001400  | -0.00003300 |
| C | 1.46601800  | -1.12982900 | 0.42300700  |

|   |             |             |             |
|---|-------------|-------------|-------------|
| C | 2.86187300  | -1.13065200 | 0.42266600  |
| C | 3.56665700  | -0.00003000 | 0.00007600  |
| C | 2.86194700  | 1.13060300  | -0.42265200 |
| C | 1.46606300  | 1.12978800  | -0.42321000 |
| H | -0.92896800 | -2.00490400 | -0.77743900 |
| H | -3.39902100 | -2.01184600 | -0.76191700 |
| H | -4.65266800 | -0.00002300 | 0.00041800  |
| H | -3.39883600 | 2.01170600  | 0.76241900  |
| H | -0.92898500 | 2.00485400  | 0.77741000  |
| H | 0.92896700  | -2.00484200 | 0.77741400  |
| H | 3.39882600  | -2.01171300 | 0.76241800  |
| H | 4.65266800  | 0.00000100  | 0.00041600  |
| H | 3.39903100  | 2.01184300  | -0.76191100 |
| H | 0.92898600  | 2.00491600  | -0.77743600 |

Optimized Coordinate of Monoradical

$E_{\parallel} = 0.00$  a.u.

0 2

|   |             |             |             |
|---|-------------|-------------|-------------|
| C | 0.32595100  | 0.00000300  | 0.00000000  |
| C | 1.06028500  | -1.15544100 | 0.35638400  |
| C | 2.44336100  | -1.16143400 | 0.35959600  |
| C | 3.19497300  | 0.00000000  | 0.00000300  |
| C | 2.44336400  | 1.16143400  | -0.35959500 |
| C | 1.06028800  | 1.15544400  | -0.35638600 |
| C | -1.15398900 | 0.00000300  | -0.00000200 |
| C | -1.88100600 | -1.14751600 | -0.37294100 |
| C | -3.27603200 | -1.14764800 | -0.37261700 |
| C | -3.98183200 | -0.00000200 | -0.00000100 |
| C | -3.27603500 | 1.14764500  | 0.37261700  |
| C | -1.88101000 | 1.14751700  | 0.37294100  |
| H | 0.52703800  | -2.05058600 | 0.66248200  |
| H | 2.97824900  | -2.06137100 | 0.65167100  |
| H | 2.97825500  | 2.06137000  | -0.65167000 |
| H | 0.52704400  | 2.05058900  | -0.66248700 |
| H | -1.34839800 | -2.03797400 | -0.69301400 |
| H | -3.81266100 | -2.04296800 | -0.67387300 |
| H | -5.06786800 | -0.00000400 | 0.00000000  |
| H | -3.81266800 | 2.04296300  | 0.67387600  |
| H | -1.34840500 | 2.03797500  | 0.69301800  |
| H | 5.15954500  | -0.88666800 | 0.27539600  |

|   |            |             |             |
|---|------------|-------------|-------------|
| H | 5.15954800 | 0.88665600  | -0.27541200 |
| C | 4.59840200 | -0.00000200 | 0.00000300  |

$E_{||} = 0.0015$  a.u.

0 2

|   |             |             |             |
|---|-------------|-------------|-------------|
| C | -0.32562500 | 0.00000100  | 0.00000000  |
| C | -1.06028000 | 1.15570600  | 0.35537600  |
| C | -2.44330900 | 1.16169700  | 0.35849100  |
| C | -3.19523500 | 0.00000000  | -0.00000200 |
| C | -2.44330800 | -1.16169700 | -0.35849200 |
| C | -1.06027900 | -1.15570500 | -0.35537500 |
| C | 1.15417100  | 0.00000100  | 0.00000100  |
| C | 1.88099300  | 1.14804000  | -0.37174400 |
| C | 3.27598700  | 1.14809200  | -0.37151600 |
| C | 3.98166700  | -0.00000100 | 0.00000100  |
| C | 3.27598600  | -1.14809300 | 0.37151700  |
| C | 1.88099200  | -1.14804000 | 0.37174500  |
| H | -0.52696900 | 2.05110700  | 0.66048800  |
| H | -2.97796700 | 2.06211600  | 0.64971700  |
| H | -2.97796500 | -2.06211600 | -0.64971800 |
| H | -0.52696700 | -2.05110600 | -0.66048600 |
| H | 1.34861300  | 2.03900100  | -0.69089300 |
| H | 3.81281300  | 2.04351800  | -0.67188600 |

|   |             |             |             |
|---|-------------|-------------|-------------|
| H | 5.06764000  | -0.00000100 | 0.00000100  |
| H | 3.81281100  | -2.04351900 | 0.67188700  |
| H | 1.34861000  | -2.03900000 | 0.69089300  |
| H | -5.15955800 | 0.88714200  | 0.27455800  |
| H | -5.15955700 | -0.88714500 | -0.27455900 |
| C | -4.59867600 | -0.00000100 | -0.00000200 |

$E_{\parallel} = 0.0030$  a.u.

0 2

|   |             |             |             |
|---|-------------|-------------|-------------|
| C | 0.32474000  | 0.00000100  | 0.00000000  |
| C | 1.06050200  | -1.15674900 | 0.35157600  |
| C | 2.44332900  | -1.16272500 | 0.35447700  |
| C | 3.19594500  | 0.00000000  | 0.00000000  |
| C | 2.44333100  | 1.16272500  | -0.35447900 |
| C | 1.06050300  | 1.15675000  | -0.35157700 |
| C | -1.15455600 | 0.00000100  | -0.00000100 |
| C | -1.88117000 | -1.14980900 | -0.36732500 |
| C | -3.27603100 | -1.14955700 | -0.36762900 |
| C | -3.98142200 | -0.00000100 | 0.00000100  |
| C | -3.27603200 | 1.14955500  | 0.36763100  |
| C | -1.88117100 | 1.14981000  | 0.36732600  |
| H | 0.52714100  | -2.05295200 | 0.65384500  |
| H | 2.97765500  | -2.06442200 | 0.64290000  |
| H | 2.97765700  | 2.06442100  | -0.64290200 |
| H | 0.52714300  | 2.05295400  | -0.65384800 |

|   |             |             |             |
|---|-------------|-------------|-------------|
| H | -1.34947100 | -2.04219800 | -0.68368600 |
| H | -3.81352900 | -2.04542400 | -0.66497800 |
| H | -5.06726600 | -0.00000200 | 0.00000200  |
| H | -3.81353200 | 2.04542200  | 0.66498100  |
| H | -1.34947400 | 2.04219900  | 0.68368800  |
| H | 5.15997900  | -0.88835300 | 0.27171000  |
| H | 5.15998000  | 0.88835000  | -0.27171100 |
| C | 4.59931900  | -0.00000100 | -0.00000100 |

$E_{||} = 0.0045$  a.u.

0 2

|   |             |             |             |
|---|-------------|-------------|-------------|
| C | 0.32388700  | 0.00000100  | 0.00000000  |
| C | 1.06086600  | -1.15861600 | 0.34537300  |
| C | 2.44343300  | -1.16451400 | 0.34820600  |
| C | 3.19678600  | 0.00000000  | 0.00000000  |
| C | 2.44343400  | 1.16451400  | -0.34820800 |
| C | 1.06086700  | 1.15861700  | -0.34537400 |
| C | -1.15461100 | 0.00000100  | 0.00000000  |
| C | -1.88154500 | -1.15230000 | -0.36050700 |
| C | -3.27623100 | -1.15179600 | -0.36117900 |
| C | -3.98159300 | -0.00000100 | 0.00000100  |
| C | -3.27623200 | 1.15179500  | 0.36118100  |
| C | -1.88154700 | 1.15230100  | 0.36050900  |
| H | 0.52769900  | -2.05633400 | 0.64314900  |

|   |             |             |             |
|---|-------------|-------------|-------------|
| H | 2.97754000  | -2.06790600 | 0.63213600  |
| H | 2.97754200  | 2.06790500  | -0.63213900 |
| H | 0.52770100  | 2.05633600  | -0.64315100 |
| H | -1.35053800 | -2.04671000 | -0.67226400 |
| H | -3.81424400 | -2.04888900 | -0.65365000 |
| H | -5.06743500 | -0.00000200 | 0.00000200  |
| H | -3.81424700 | 2.04888700  | 0.65365300  |
| H | -1.35054100 | 2.04671200  | 0.67226700  |
| H | 5.16067500  | -0.88994500 | 0.26711900  |
| H | 5.16067600  | 0.88994200  | -0.26711900 |
| C | 4.60001400  | -0.00000100 | -0.00000100 |

$E_{\parallel} = 0.0060$  a.u.

0 2

|   |             |             |             |
|---|-------------|-------------|-------------|
| C | -0.32757600 | 0.00000000  | 0.00000000  |
| C | -1.06232600 | 1.16360600  | 0.33244300  |
| C | -2.44475300 | 1.16929100  | 0.33719200  |
| C | -3.19636600 | 0.00000000  | 0.00000000  |
| C | -2.44475200 | -1.16929100 | -0.33719200 |
| C | -1.06232600 | -1.16360600 | -0.33244200 |
| C | 1.14971500  | 0.00000000  | 0.00000000  |
| C | 1.88345300  | 1.15331000  | -0.35044500 |
| C | 3.27824700  | 1.15428800  | -0.34788900 |
| C | 3.98790900  | 0.00000000  | 0.00000000  |

|   |             |             |             |
|---|-------------|-------------|-------------|
| C | 3.27824600  | -1.15428800 | 0.34788900  |
| C | 1.88345300  | -1.15331000 | 0.35044500  |
| H | -0.53303400 | 2.06657500  | 0.62325900  |
| H | -2.98072200 | 2.07327500  | 0.61239800  |
| H | -2.98072200 | -2.07327500 | -0.61239800 |
| H | -0.53303300 | -2.06657500 | -0.62325800 |
| H | 1.35139300  | 2.04955400  | -0.65355500 |
| H | 3.81132300  | 2.05877800  | -0.63121700 |
| H | 5.07532900  | -0.00000100 | 0.00000000  |
| H | 3.81132200  | -2.05877900 | 0.63121700  |
| H | 1.35139200  | -2.04955300 | 0.65355400  |
| H | -5.16091400 | 0.89070900  | 0.25723900  |
| H | -5.16091400 | -0.89071000 | -0.25723900 |
| C | -4.59816200 | 0.00000000  | 0.00000000  |

$E_{||} = 0.0075$  a.u.

0 2

|   |             |             |             |
|---|-------------|-------------|-------------|
| C | 0.31925700  | 0.00000000  | 0.00000000  |
| C | 1.06154100  | -1.16349100 | 0.32642400  |
| C | 2.44319700  | -1.16924600 | 0.32827500  |
| C | 3.20029000  | 0.00000000  | 0.00000000  |
| C | 2.44319700  | 1.16924600  | -0.32827500 |
| C | 1.06154100  | 1.16349100  | -0.32642400 |
| C | -1.15642100 | 0.00000000  | 0.00000000  |



|   |             |             |             |
|---|-------------|-------------|-------------|
| C | -1.88226500 | -1.16093400 | -0.33802400 |
| C | -3.27618200 | -1.15919900 | -0.34124900 |
| C | -3.97994500 | 0.00000000  | 0.00000000  |
| C | -3.27618200 | 1.15919900  | 0.34124900  |
| C | -1.88226500 | 1.16093400  | 0.33802400  |
| H | 0.52822300  | -2.06539200 | 0.60933000  |
| H | 2.97549800  | -2.07899200 | 0.59767700  |
| H | 2.97549800  | 2.07899200  | -0.59767700 |
| H | 0.52822300  | 2.06539200  | -0.60933000 |
| H | -1.35438800 | -2.06245900 | -0.63483600 |
| H | -3.81745100 | -2.05855500 | -0.61785800 |
| H | -5.06516000 | 0.00000000  | 0.00000000  |
| H | -3.81745100 | 2.05855500  | 0.61785800  |
| H | -1.35438800 | 2.06245900  | 0.63483700  |
| H | 5.16332900  | -0.89552400 | 0.25279700  |
| H | 5.16332900  | 0.89552400  | -0.25279700 |
| C | 4.60336000  | 0.00000000  | 0.00000000  |

$E_{||} = 0.0090$  a.u.

0 2

|   |            |             |             |
|---|------------|-------------|-------------|
| C | 0.31815800 | 0.00000000  | 0.00000000  |
| C | 1.06249700 | -1.16759800 | 0.31186800  |
| C | 2.44363800 | -1.17311000 | 0.31400400  |
| C | 3.20210300 | 0.00000000  | -0.00000100 |

|   |             |             |             |
|---|-------------|-------------|-------------|
| C | 2.44363800  | 1.17311000  | -0.31400500 |
| C | 1.06249700  | 1.16759800  | -0.31186900 |
| C | -1.15559100 | 0.00000000  | 0.00000000  |
| C | -1.88350900 | -1.16547400 | -0.32310600 |
| C | -3.27699900 | -1.16367700 | -0.32640400 |
| C | -3.98151500 | 0.00000000  | 0.00000100  |
| C | -3.27699900 | 1.16367700  | 0.32640500  |
| C | -1.88350900 | 1.16547400  | 0.32310700  |
| H | 0.53055900  | -2.07344500 | 0.58443200  |
| H | 2.97568200  | -2.08615500 | 0.57281700  |
| H | 2.97568200  | 2.08615500  | -0.57281900 |
| H | 0.53055900  | 2.07344400  | -0.58443200 |
| H | -1.35684600 | -2.07101100 | -0.60927800 |
| H | -3.81833800 | -2.06650000 | -0.59182400 |
| H | -5.06702500 | 0.00000000  | 0.00000100  |
| H | -3.81833700 | 2.06650000  | 0.59182500  |
| H | -1.35684500 | 2.07101100  | 0.60927800  |
| H | 5.16507300  | -0.89851600 | 0.24188300  |
| H | 5.16507300  | 0.89851600  | -0.24188500 |
| C | 4.60471800  | 0.00000000  | -0.00000100 |

$E_{||} = 0.0115$  a.u.

0 2

|   |            |            |            |
|---|------------|------------|------------|
| C | 0.31394000 | 0.00050700 | 0.00104900 |
|---|------------|------------|------------|

|   |             |             |             |
|---|-------------|-------------|-------------|
| C | 1.06390500  | -1.17427900 | 0.28401200  |
| C | 2.44397300  | -1.17968200 | 0.28555200  |
| C | 3.20694800  | -0.00006200 | -0.00023400 |
| C | 2.44433900  | 1.18004100  | -0.28482500 |
| C | 1.06427200  | 1.17528700  | -0.28133600 |
| C | -1.15538800 | 0.00018600  | 0.00083500  |
| C | -1.88575300 | -1.17523600 | -0.29122200 |
| C | -3.27782900 | -1.17337100 | -0.29673600 |
| C | -3.98290100 | -0.00040200 | -0.00144100 |
| C | -3.27866000 | 1.17267600  | 0.29564100  |
| C | -1.88655300 | 1.17525400  | 0.29224200  |
| H | 0.53369100  | -2.08739600 | 0.53358300  |
| H | 2.97448500  | -2.10002400 | 0.52244100  |
| H | 2.97508400  | 2.09989000  | -0.52315900 |
| H | 0.53426200  | 2.08819600  | -0.53189000 |
| H | -1.36184900 | -2.08919500 | -0.55437300 |
| H | -3.82061700 | -2.08145300 | -0.54000400 |
| H | -5.06832300 | -0.00057700 | -0.00249700 |
| H | -3.82216200 | 2.08084800  | 0.53687300  |
| H | -1.36351400 | 2.08989900  | 0.55462000  |
| H | 5.17002400  | -0.90544400 | 0.21799800  |
| H | 5.17031100  | 0.90366900  | -0.22311900 |
| C | 4.60947500  | -0.00065400 | -0.00194800 |

$E_{\parallel} = 0.0130$  a.u.

O 2

|   |             |             |             |
|---|-------------|-------------|-------------|
| C | 0.31394000  | 0.00050700  | 0.00104900  |
| C | 1.06390500  | -1.17427900 | 0.28401200  |
| C | 2.44397300  | -1.17968200 | 0.28555200  |
| C | 3.20694800  | -0.00006200 | -0.00023400 |
| C | 2.44433900  | 1.18004100  | -0.28482500 |
| C | 1.06427200  | 1.17528700  | -0.28133600 |
| C | -1.15538800 | 0.00018600  | 0.00083500  |
| C | -1.88575300 | -1.17523600 | -0.29122200 |
| C | -3.27782900 | -1.17337100 | -0.29673600 |
| C | -3.98290100 | -0.00040200 | -0.00144100 |
| C | -3.27866000 | 1.17267600  | 0.29564100  |
| C | -1.88655300 | 1.17525400  | 0.29224200  |
| H | 0.53369100  | -2.08739600 | 0.53358300  |
| H | 2.97448500  | -2.10002400 | 0.52244100  |
| H | 2.97508400  | 2.09989000  | -0.52315900 |
| H | 0.53426200  | 2.08819600  | -0.53189000 |
| H | -1.36184900 | -2.08919500 | -0.55437300 |
| H | -3.82061700 | -2.08145300 | -0.54000400 |
| H | -5.06832300 | -0.00057700 | -0.00249700 |
| H | -3.82216200 | 2.08084800  | 0.53687300  |
| H | -1.36351400 | 2.08989900  | 0.55462000  |
| H | 5.17002400  | -0.90544400 | 0.21799800  |
| H | 5.17031100  | 0.90366900  | -0.22311900 |

C            4.60947500 -0.00065400 -0.00194800

$E_{\parallel} = 0.0145$  a.u.

0 2

C            0.31394000 0.00050700 0.00104900

C            1.06390500 -1.17427900 0.28401200

C            2.44397300 -1.17968200 0.28555200

C            3.20694800 -0.00006200 -0.00023400

C            2.44433900 1.18004100 -0.28482500

C            1.06427200 1.17528700 -0.28133600

C            -1.15538800 0.00018600 0.00083500

C            -1.88575300 -1.17523600 -0.29122200

C            -3.27782900 -1.17337100 -0.29673600

C            -3.98290100 -0.00040200 -0.00144100

C            -3.27866000 1.17267600 0.29564100

C            -1.88655300 1.17525400 0.29224200

H            0.53369100 -2.08739600 0.53358300

H            2.97448500 -2.10002400 0.52244100

H            2.97508400 2.09989000 -0.52315900

H            0.53426200 2.08819600 -0.53189000

H            -1.36184900 -2.08919500 -0.55437300

H            -3.82061700 -2.08145300 -0.54000400

H            -5.06832300 -0.00057700 -0.00249700

|   |             |             |             |
|---|-------------|-------------|-------------|
| H | -3.82216200 | 2.08084800  | 0.53687300  |
| H | -1.36351400 | 2.08989900  | 0.55462000  |
| H | 5.17002400  | -0.90544400 | 0.21799800  |
| H | 5.17031100  | 0.90366900  | -0.22311900 |
| C | 4.60947500  | -0.00065400 | -0.00194800 |

$E_{\parallel} = 0.0160$  a.u.

0 2

|   |             |             |             |
|---|-------------|-------------|-------------|
| C | 0.31394000  | 0.00050700  | 0.00104900  |
| C | 1.06390500  | -1.17427900 | 0.28401200  |
| C | 2.44397300  | -1.17968200 | 0.28555200  |
| C | 3.20694800  | -0.00006200 | -0.00023400 |
| C | 2.44433900  | 1.18004100  | -0.28482500 |
| C | 1.06427200  | 1.17528700  | -0.28133600 |
| C | -1.15538800 | 0.00018600  | 0.00083500  |
| C | -1.88575300 | -1.17523600 | -0.29122200 |
| C | -3.27782900 | -1.17337100 | -0.29673600 |
| C | -3.98290100 | -0.00040200 | -0.00144100 |
| C | -3.27866000 | 1.17267600  | 0.29564100  |
| C | -1.88655300 | 1.17525400  | 0.29224200  |
| H | 0.53369100  | -2.08739600 | 0.53358300  |
| H | 2.97448500  | -2.10002400 | 0.52244100  |
| H | 2.97508400  | 2.09989000  | -0.52315900 |
| H | 0.53426200  | 2.08819600  | -0.53189000 |

|   |             |             |             |
|---|-------------|-------------|-------------|
| H | -1.36184900 | -2.08919500 | -0.55437300 |
| H | -3.82061700 | -2.08145300 | -0.54000400 |
| H | -5.06832300 | -0.00057700 | -0.00249700 |
| H | -3.82216200 | 2.08084800  | 0.53687300  |
| H | -1.36351400 | 2.08989900  | 0.55462000  |
| H | 5.17002400  | -0.90544400 | 0.21799800  |
| H | 5.17031100  | 0.90366900  | -0.22311900 |
| C | 4.60947500  | -0.00065400 | -0.00194800 |

$E_{\perp} = 0.0015$  a.u.

0 2

|   |             |             |             |
|---|-------------|-------------|-------------|
| C | -0.32591700 | 0.00004900  | -0.00046400 |
| C | -1.06035500 | -1.15533600 | -0.35683000 |
| C | -2.44342500 | -1.16130700 | -0.35984300 |
| C | -3.19511500 | 0.00006600  | 0.00001600  |
| C | -2.44328900 | 1.16144900  | 0.35956300  |
| C | -1.06022100 | 1.15545700  | 0.35611400  |
| C | 1.15398600  | -0.00004600 | -0.00036800 |
| C | 1.88091200  | -1.14751700 | 0.37287300  |
| C | 3.27593900  | -1.14767400 | 0.37291700  |
| C | 3.98189600  | -0.00006200 | 0.00044600  |
| C | 3.27616700  | 1.14755400  | -0.37244600 |
| C | 1.88113900  | 1.14740500  | -0.37322500 |
| H | -0.52723900 | -2.05062900 | -0.66274500 |

|   |             |             |             |
|---|-------------|-------------|-------------|
| H | -2.97822600 | -2.06140200 | -0.65162500 |
| H | -2.97796300 | 2.06138900  | 0.65203500  |
| H | -0.52702300 | 2.05058900  | 0.66233700  |
| H | 1.34829700  | -2.03795400 | 0.69301400  |
| H | 3.81238100  | -2.04294200 | 0.67464600  |
| H | 5.06792400  | 0.00001300  | 0.00104700  |
| H | 3.81280700  | 2.04299200  | -0.67333900 |
| H | 1.34868700  | 2.03800900  | -0.69318800 |
| H | -5.15945400 | -0.88694000 | -0.27433700 |
| H | -5.15935200 | 0.88666000  | 0.27646800  |
| C | -4.59852100 | -0.00000200 | 0.00052600  |

$E_{\perp} = 0.0030$  a.u.

0 2

|   |             |             |             |
|---|-------------|-------------|-------------|
| C | 0.32591700  | 0.00207200  | 0.01966600  |
| C | 1.05722500  | 1.15760600  | -0.34278100 |
| C | 2.44025300  | 1.16403400  | -0.35590400 |
| C | 3.19501600  | 0.00285000  | -0.00183800 |
| C | 2.44636600  | -1.15797200 | 0.36603000  |
| C | 1.06324100  | -1.15249100 | 0.37253000  |
| C | -1.15400900 | -0.00199800 | 0.01616300  |
| C | -1.88566400 | 1.14467500  | 0.38243200  |
| C | -3.28064300 | 1.14466400  | 0.36507500  |
| C | -3.98169600 | -0.00262200 | -0.01762900 |



|   |             |             |             |
|---|-------------|-------------|-------------|
| C | -3.27118400 | -1.14976600 | -0.38286800 |
| C | -1.87625300 | -1.14948800 | -0.36613400 |
| H | 0.52206100  | 2.04903900  | -0.65594600 |
| H | 2.97201900  | 2.06041600  | -0.66377500 |
| H | 2.98383200  | -2.06093700 | 0.64420700  |
| H | 0.53189400  | -2.05080000 | 0.67310500  |
| H | -1.35634900 | 2.03838900  | 0.69937200  |
| H | -3.82111600 | 2.04326900  | 0.64971600  |
| H | -5.06742600 | 0.00059300  | -0.04282100 |
| H | -3.80344800 | -2.04109100 | -0.70268300 |
| H | -1.34025000 | -2.03607300 | -0.69094400 |
| H | 5.15647500  | 0.88055100  | -0.32348400 |
| H | 5.16106700  | -0.89237400 | 0.22917400  |
| C | 4.59830500  | -0.00006000 | -0.02406400 |

$E_{\perp} = 0.0045$  a.u.

0.2

|   |             |             |             |
|---|-------------|-------------|-------------|
| C | 0.32592300  | 0.00315700  | 0.02983400  |
| C | 1.05555100  | 1.15832900  | -0.33718900 |
| C | 2.43856800  | 1.16495200  | -0.35554800 |
| C | 3.19486600  | 0.00433700  | -0.00282700 |
| C | 2.44790400  | -1.15570900 | 0.37089300  |
| C | 1.06473300  | -1.15052400 | 0.38234000  |
| C | -1.15404400 | -0.00304100 | 0.02450900  |

|   |             |             |             |
|---|-------------|-------------|-------------|
| C | -1.88803600 | 1.14273400  | 0.38883600  |
| C | -3.28294500 | 1.14260800  | 0.36276300  |
| C | -3.98141400 | -0.00399700 | -0.02677100 |
| C | -3.26849700 | -1.15038900 | -0.38978600 |
| C | -1.87366700 | -1.15007300 | -0.36411700 |
| H | 0.51921500  | 2.04737000  | -0.65499600 |
| H | 2.96868700  | 2.05901600  | -0.67267500 |
| H | 2.98672100  | -2.05977500 | 0.64310800  |
| H | 0.53422400  | -2.05000700 | 0.68119900  |
| H | -1.36027700 | 2.03763900  | 0.70532500  |
| H | -3.82536400 | 2.04242600  | 0.64007500  |
| H | -5.06676100 | 0.00088500  | -0.06491800 |
| H | -3.79838500 | -2.03915200 | -0.72029600 |
| H | -1.33570200 | -2.03415100 | -0.69238400 |
| H | 5.15443000  | 0.87688800  | -0.34945000 |
| H | 5.16144600  | -0.89486300 | 0.20661700  |
| C | 4.59801800  | -0.00009800 | -0.03653700 |

$E_{\perp} = 0.0060$  a.u.

0 2

|   |            |            |             |
|---|------------|------------|-------------|
| C | 0.32593100 | 0.00426500 | 0.03999600  |
| C | 1.05380500 | 1.15880700 | -0.33249600 |
| C | 2.43681500 | 1.16560200 | -0.35617400 |
| C | 3.19465300 | 0.00584700 | -0.00384500 |

|   |             |             |             |
|---|-------------|-------------|-------------|
| C | 2.44944400  | -1.15312700 | 0.37668400  |
| C | 1.06621500  | -1.14826000 | 0.39303900  |
| C | -1.15409200 | -0.00410700 | 0.03285000  |
| C | -1.89040900 | 1.14047500  | 0.39616100  |
| C | -3.28521600 | 1.14021700  | 0.36141300  |
| C | -3.98101400 | -0.00539100 | -0.03593300 |
| C | -3.26567400 | -1.15072100 | -0.39769200 |
| C | -1.87098600 | -1.15038200 | -0.36304300 |
| H | 0.51620000  | 2.04518900  | -0.65546900 |
| H | 2.96520400  | 2.05707800  | -0.68315800 |
| H | 2.98957500  | -2.05804700 | 0.64372700  |
| H | 0.53650500  | -2.04867000 | 0.69088400  |
| H | -1.36416500 | 2.03630300  | 0.71291100  |
| H | -3.82953100 | 2.04097100  | 0.63221100  |
| H | -5.06582500 | 0.00117200  | -0.08692100 |
| H | -3.79306300 | -2.03662500 | -0.73950400 |
| H | -1.33093600 | -2.03166300 | -0.69531600 |
| H | 5.15202500  | 0.87295300  | -0.37594000 |
| H | 5.16152900  | -0.89711600 | 0.18496900  |
| C | 4.59760800  | -0.00014900 | -0.04902600 |

$E_{\perp} = 0.0075$  a.u.

0 2

|   |            |            |            |
|---|------------|------------|------------|
| C | 0.32594200 | 0.00542500 | 0.05035200 |
|---|------------|------------|------------|

|   |             |             |             |
|---|-------------|-------------|-------------|
| C | 1.05194600  | 1.15905800  | -0.32858000 |
| C | 2.43495000  | 1.16600400  | -0.35776700 |
| C | 3.19437200  | 0.00741100  | -0.00492900 |
| C | 2.45103000  | -1.15016600 | 0.38348700  |
| C | 1.06773300  | -1.14564100 | 0.40481600  |
| C | -1.15415700 | -0.00521700 | 0.04134100  |
| C | -1.89285800 | 1.13784300  | 0.40452100  |
| C | -3.28752600 | 1.13743300  | 0.36096300  |
| C | -3.98048700 | -0.00684200 | -0.04530600 |
| C | -3.26263900 | -1.15077600 | -0.40671700 |
| C | -1.86813600 | -1.15042800 | -0.36286300 |
| H | 0.51294800  | 2.04246500  | -0.65729600 |
| H | 2.96148000  | 2.05457100  | -0.69535400 |
| H | 2.99247500  | -2.05571100 | 0.64604900  |
| H | 0.53880800  | -2.04675400 | 0.70234500  |
| H | -1.36813400 | 2.03435300  | 0.72226700  |
| H | -3.83374700 | 2.03886600  | 0.62594600  |
| H | -5.06460100 | 0.00145000  | -0.10924900 |
| H | -3.78733700 | -2.03347200 | -0.76060400 |
| H | -1.32582900 | -2.02856800 | -0.69970900 |
| H | 5.14920300  | 0.86866400  | -0.40340200 |
| H | 5.16132800  | -0.89919200 | 0.16382800  |
| C | 4.59706300  | -0.00021800 | -0.06179000 |

$E_{\perp} = 0.0090$  a.u.

0 2

|   |             |             |             |
|---|-------------|-------------|-------------|
| C | 0.32594200  | 0.00662900  | 0.06097500  |
| C | 1.06933700  | -1.14260000 | 0.41786200  |
| C | 2.45270600  | -1.14673400 | 0.39145700  |
| C | 3.19404200  | 0.00905900  | -0.00611200 |
| C | 2.43292700  | 1.16612300  | -0.36045600 |
| C | 1.04993700  | 1.15904100  | -0.32549200 |
| C | -1.15422900 | -0.00640100 | 0.05005000  |
| C | -1.86508800 | -1.15017400 | -0.36367700 |
| C | -3.25935300 | -1.15049900 | -0.41705900 |
| C | -3.97983800 | -0.00835500 | -0.05498000 |
| C | -3.28991500 | 1.13417400  | 0.36151100  |
| C | -1.89542300 | 1.13475100  | 0.41407600  |
| H | 0.54121300  | -2.04417900 | 0.71588400  |
| H | 2.99548100  | -2.05265600 | 0.65034100  |
| H | 2.95740500  | 2.05141900  | -0.70951900 |
| H | 0.50940300  | 2.03911900  | -0.66055500 |
| H | -1.32034200 | -2.02479800 | -0.70570300 |
| H | -3.78110600 | -2.02958500 | -0.78391200 |
| H | -5.06308200 | 0.00173200  | -0.13204200 |
| H | -3.83805000 | 2.03601200  | 0.62149600  |
| H | -1.37225000 | 2.03167600  | 0.73366900  |
| H | 5.16089200  | -0.90103800 | 0.14317500  |
| H | 5.14593700  | 0.86395200  | -0.43209000 |

C 4.59637100 -0.00028900 -0.07494700

$E_{\perp} = 0.0115$  a.u.

0 2

C 0.32598000 0.00893800 0.07942200  
C 1.07212400 -1.13643100 0.44250000  
C 2.45565400 -1.13991700 0.40726600  
C 3.19326300 0.01197700 -0.00833200  
C 2.42920700 1.16573300 -0.36730600  
C 1.04624500 1.15852200 -0.32213600  
C -1.15441200 -0.00847200 0.06506900  
C -1.85935300 -1.14906900 -0.36717300  
C -3.25308300 -1.14939600 -0.43719200  
C -3.97837300 -0.01115800 -0.07191900  
C -3.29418600 1.12756100 0.36452000  
C -1.90008800 1.12854800 0.43267400  
H 0.54533200 -2.03821300 0.74315400  
H 3.00073200 -2.04592300 0.66166800  
H 2.94996200 2.04462600 -0.73732200  
H 0.50279400 2.03215400 -0.66919700  
H -1.30992800 -2.01683800 -0.71911200  
H -3.76933400 -2.02149500 -0.82756900  
H -5.05977400 0.00205100 -0.17124200

|   |             |             |             |
|---|-------------|-------------|-------------|
| H | -3.84576700 | 2.02939700  | 0.61782100  |
| H | -1.37969800 | 2.02558000  | 0.75733400  |
| H | 5.15946900  | -0.90388400 | 0.10975700  |
| H | 5.13936700  | 0.85500900  | -0.48246100 |
| C | 4.59483000  | -0.00057900 | -0.09786500 |

$E_{\perp} = 0.0130$  a.u.

0 2

|   |             |             |             |
|---|-------------|-------------|-------------|
| C | 0.32598800  | 0.01037800  | 0.09089200  |
| C | 1.07401700  | -1.13211400 | 0.45893600  |
| C | 2.45764900  | -1.13511400 | 0.41821000  |
| C | 3.19274400  | 0.01390000  | -0.00981800 |
| C | 2.42668200  | 1.16511300  | -0.37283700 |
| C | 1.04376600  | 1.15781400  | -0.32114600 |
| C | -1.15453900 | -0.00991900 | 0.07445800  |
| C | -1.85562200 | -1.14801300 | -0.37052100 |
| C | -3.24893100 | -1.14824100 | -0.45099700 |
| C | -3.97733300 | -0.01291000 | -0.08252500 |
| C | -3.29691200 | 1.12289200  | 0.36755600  |
| C | -1.90311300 | 1.12410600  | 0.44535000  |
| H | 0.54818000  | -2.03373100 | 0.76234500  |
| H | 3.00419400  | -2.04083300 | 0.67095700  |
| H | 2.94488700  | 2.03965900  | -0.75642300 |
| H | 0.49834000  | 2.02707400  | -0.67608500 |

|   |             |             |             |
|---|-------------|-------------|-------------|
| H | -1.30315500 | -2.01112000 | -0.72918300 |
| H | -3.76150100 | -2.01553700 | -0.85655700 |
| H | -5.05737900 | 0.00233900  | -0.19536900 |
| H | -3.85060600 | 2.02439600  | 0.61786900  |
| H | -1.38453000 | 2.02087900  | 0.77418100  |
| H | 5.15833700  | -0.90527500 | 0.09031400  |
| H | 5.13471900  | 0.84908800  | -0.51419500 |
| C | 4.59369000  | -0.00071600 | -0.11220000 |

$E_{\perp} = 0.0145$  a.u.

0 2

|   |             |             |             |
|---|-------------|-------------|-------------|
| C | 0.32602300  | 0.01206000  | 0.10302700  |
| C | 1.07605600  | -1.12681300 | 0.47782200  |
| C | 2.45981200  | -1.12931100 | 0.43126800  |
| C | 3.19205900  | 0.01598100  | -0.01153400 |
| C | 2.42383600  | 1.16398000  | -0.38027100 |
| C | 1.04097800  | 1.15667300  | -0.32154600 |
| C | -1.15471000 | -0.01145600 | 0.08430100  |
| C | -1.85131900 | -1.14634900 | -0.37562100 |
| C | -3.24411500 | -1.14651000 | -0.46723000 |
| C | -3.97601700 | -0.01490700 | -0.09387100 |
| C | -3.29995000 | 1.11716800  | 0.37226500  |
| C | -1.90651300 | 1.11871000  | 0.46026200  |



|   |             |             |             |
|---|-------------|-------------|-------------|
| H | 0.55118400  | -2.02780600 | 0.78542000  |
| H | 3.00795000  | -2.03429600 | 0.68372000  |
| H | 2.93921600  | 2.03338300  | -0.77900800 |
| H | 0.49327400  | 2.02081500  | -0.68547800 |
| H | -1.29530200 | -2.00397700 | -0.74198600 |
| H | -3.75251100 | -2.00819000 | -0.88961000 |
| H | -5.05448800 | 0.00249500  | -0.22063900 |
| H | -3.85604000 | 2.01778100  | 0.62098000  |
| H | -1.38992600 | 2.01473600  | 0.79488300  |
| H | 5.15689400  | -0.90646200 | 0.07150600  |
| H | 5.12934300  | 0.84216400  | -0.54830700 |
| C | 4.59226100  | -0.00100100 | -0.12745100 |

$E_{\perp} = 0.0160$  a.u.

0 2

|   |             |             |             |
|---|-------------|-------------|-------------|
| C | 0.32607200  | 0.01394600  | 0.11574200  |
| C | 1.07831600  | -1.12054400 | 0.49893100  |
| C | 2.46221300  | -1.12249300 | 0.44624100  |
| C | 3.19125600  | 0.01824600  | -0.01346900 |
| C | 2.42064100  | 1.16232400  | -0.38948800 |
| C | 1.03786800  | 1.15505900  | -0.32325400 |
| C | -1.15491900 | -0.01315900 | 0.09458300  |
| C | -1.84649900 | -1.14408700 | -0.38234900 |
| C | -3.23867500 | -1.14415500 | -0.48569700 |
| C | -3.97446900 | -0.01710300 | -0.10586400 |

|   |             |             |             |
|---|-------------|-------------|-------------|
| C | -3.30331000 | 1.11039400  | 0.37852100  |
| C | -1.91030300 | 1.11232100  | 0.47719500  |
| H | 0.55453300  | -2.02049700 | 0.81213000  |
| H | 3.01208500  | -2.02631100 | 0.69968200  |
| H | 2.93287700  | 2.02582700  | -0.80473000 |
| H | 0.48760500  | 2.01336900  | -0.69714100 |
| H | -1.28650900 | -1.99544700 | -0.75733800 |
| H | -3.74240200 | -1.99940200 | -0.92632300 |
| H | -5.05114000 | 0.00260900  | -0.24683200 |
| H | -3.86203800 | 2.00960700  | 0.62694000  |
| H | -1.39595500 | 2.00715300  | 0.81910800  |
| H | 5.15520300  | -0.90739800 | 0.05340700  |
| H | 5.12322600  | 0.83430600  | -0.58444800 |
| C | 4.59056000  | -0.00138400 | -0.14350200 |

## Optimized Coordinate of Di-radical

$E_{||} = 0.00$  a.u.

0 3

|   |             |             |             |
|---|-------------|-------------|-------------|
| C | -0.64219400 | 0.11921100  | -0.02910500 |
| C | -1.26726900 | -1.07686400 | -0.45726500 |
| C | -2.64117700 | -1.22374600 | -0.43481000 |
| C | -3.49731900 | -0.17444300 | 0.02617300  |
| C | -2.85587000 | 1.02920800  | 0.45749800  |
| C | -1.48086600 | 1.16520200  | 0.42602200  |
| C | 0.82762000  | 0.27151400  | -0.05569700 |
| C | 1.67061300  | -0.82026000 | 0.17844100  |
| C | 3.09131800  | -0.70387900 | 0.15710800  |
| C | 3.64398800  | 0.58500500  | -0.11350900 |
| C | 2.81399000  | 1.67225400  | -0.34392600 |
| C | 1.42080500  | 1.52988400  | -0.31832600 |
| H | -0.65594600 | -1.88758900 | -0.84198100 |
| H | -3.09055600 | -2.14919700 | -0.78531500 |
| H | -3.47048800 | 1.84593900  | 0.82684300  |
| H | -1.03335700 | 2.08613200  | 0.78764700  |
| H | 1.24110500  | -1.78939900 | 0.41521700  |
| H | 4.72378800  | 0.70278200  | -0.13613400 |
| H | 3.24673600  | 2.64569100  | -0.55754000 |
| H | 0.79170000  | 2.38739500  | -0.53337300 |

|   |             |             |             |
|---|-------------|-------------|-------------|
| C | -4.89099000 | -0.31766000 | 0.05223900  |
| C | 3.91650100  | -1.81730700 | 0.40385200  |
| H | 3.49360600  | -2.79370100 | 0.61462800  |
| H | 4.99733200  | -1.72698200 | 0.39326800  |
| H | -5.36754700 | -1.23379300 | -0.27994300 |
| H | -5.53127100 | 0.48400700  | 0.40450700  |

$E_{\parallel} = 0.0015$  a.u.

0 3

|   |             |             |             |
|---|-------------|-------------|-------------|
| C | -0.64300700 | 0.11869900  | -0.02809300 |
| C | -1.26733100 | -1.07836800 | -0.45431800 |
| C | -2.64132600 | -1.22493500 | -0.43281200 |
| C | -3.49733300 | -0.17447800 | 0.02579700  |
| C | -2.85644400 | 1.02994900  | 0.45574400  |
| C | -1.48140100 | 1.16585900  | 0.42463200  |
| C | 0.82667800  | 0.27097800  | -0.05447100 |
| C | 1.67140900  | -0.81990500 | 0.17928600  |
| C | 3.09202900  | -0.70320400 | 0.15642700  |
| C | 3.64486100  | 0.58566200  | -0.11392300 |
| C | 2.81382900  | 1.67248400  | -0.34323100 |
| C | 1.42074000  | 1.52915400  | -0.31741000 |
| H | -0.65642500 | -1.89013200 | -0.83785800 |
| H | -3.09085700 | -2.15052900 | -0.78236600 |
| H | -3.47134700 | 1.84716900  | 0.82306900  |

|   |             |             |             |
|---|-------------|-------------|-------------|
| H | -1.03489200 | 2.08779200  | 0.78523300  |
| H | 1.24203300  | -1.78905200 | 0.41602500  |
| H | 4.72491600  | 0.70358400  | -0.13724900 |
| H | 3.24512200  | 2.64680600  | -0.55667500 |
| H | 0.79108100  | 2.38634200  | -0.53179600 |
| C | -4.89091700 | -0.31723000 | 0.05069800  |
| C | 3.91753400  | -1.81694000 | 0.40194600  |
| H | 3.49467400  | -2.79386500 | 0.61081300  |
| H | 4.99863200  | -1.72591800 | 0.38885800  |
| H | -5.36745800 | -1.23367900 | -0.28054400 |
| H | -5.53140300 | 0.48513300  | 0.40086000  |

$E_{\parallel} = 0.0030$  a.u.

0 3

|   |             |             |             |
|---|-------------|-------------|-------------|
| C | -0.64361500 | 0.11773000  | -0.02634100 |
| C | -1.26744400 | -1.08202200 | -0.44638900 |
| C | -2.64138500 | -1.22811500 | -0.42634800 |
| C | -3.49777300 | -0.17462900 | 0.02512200  |
| C | -2.85744900 | 1.03225000  | 0.44955500  |
| C | -1.48250100 | 1.16781500  | 0.41929600  |
| C | 0.82550000  | 0.27008500  | -0.05255200 |
| C | 1.67276900  | -0.82011200 | 0.17843100  |
| C | 3.09323100  | -0.70250000 | 0.15383800  |
| C | 3.64588600  | 0.58711900  | -0.11384400 |

|   |             |             |             |
|---|-------------|-------------|-------------|
| C | 2.81325000  | 1.67360300  | -0.33963000 |
| C | 1.42037200  | 1.52886000  | -0.31346300 |
| H | -0.65694900 | -1.89631700 | -0.82543000 |
| H | -3.09106400 | -2.15503600 | -0.77176000 |
| H | -3.47302600 | 1.85124600  | 0.81128700  |
| H | -1.03740000 | 2.09207000  | 0.77585700  |
| H | 1.24446900  | -1.78999400 | 0.41371400  |
| H | 4.72615500  | 0.70534900  | -0.13787000 |
| H | 3.24255900  | 2.64938000  | -0.55127300 |
| H | 0.79017000  | 2.38606700  | -0.52569500 |
| C | -4.89106500 | -0.31658800 | 0.04817000  |
| C | 3.91966800  | -1.81649200 | 0.39606500  |
| H | 3.49792000  | -2.79412200 | 0.60360900  |
| H | 5.00087900  | -1.72406300 | 0.38282600  |
| H | -5.36798400 | -1.23419500 | -0.27891300 |
| H | -5.53239300 | 0.48758100  | 0.39220000  |

$E_{\parallel} = 0.0045$  a.u.

0 3

|   |             |             |             |
|---|-------------|-------------|-------------|
| C | -0.64409700 | 0.11657700  | -0.02409300 |
| C | -1.26746400 | -1.08719500 | -0.43461100 |
| C | -2.64127600 | -1.23271700 | -0.41644700 |
| C | -3.49849800 | -0.17490000 | 0.02415100  |

|   |             |             |             |
|---|-------------|-------------|-------------|
| C | -2.85882800 | 1.03565600  | 0.43993700  |
| C | -1.48405900 | 1.17081800  | 0.41093300  |
| C | 0.82410100  | 0.26909900  | -0.04999200 |
| C | 1.67445800  | -0.82065200 | 0.17650600  |
| C | 3.09471600  | -0.70180200 | 0.15010800  |
| C | 3.64703000  | 0.58907100  | -0.11323100 |
| C | 2.81244100  | 1.67535200  | -0.33385900 |
| C | 1.41984500  | 1.52896900  | -0.30724600 |
| H | -0.65733100 | -1.90523800 | -0.80637800 |
| H | -3.09082400 | -2.16201100 | -0.75524500 |
| H | -3.47522200 | 1.85745800  | 0.79342200  |
| H | -1.04078800 | 2.09844900  | 0.76114800  |
| H | 1.24755200  | -1.79171900 | 0.40905800  |
| H | 4.72754500  | 0.70789900  | -0.13806400 |
| H | 3.23957900  | 2.65295200  | -0.54249800 |
| H | 0.78909900  | 2.38646900  | -0.51616400 |
| C | -4.89142100 | -0.31593700 | 0.04478700  |
| C | 3.92249200  | -1.81615100 | 0.38731900  |
| H | 3.50213600  | -2.79502700 | 0.59185300  |
| H | 5.00387900  | -1.72190100 | 0.37344200  |
| H | -5.36852000 | -1.23565500 | -0.27589800 |
| H | -5.53374200 | 0.49119300  | 0.37976000  |

$E_{||} = 0.0060$  a.u.

0 3

|   |             |             |             |
|---|-------------|-------------|-------------|
| C | -0.64445400 | 0.11535300  | -0.02128000 |
| C | -1.26741400 | -1.09384800 | -0.41847600 |
| C | -2.64099800 | -1.23878900 | -0.40270200 |
| C | -3.49955800 | -0.17530600 | 0.02276500  |
| C | -2.86070200 | 1.04022100  | 0.42642700  |
| C | -1.48620700 | 1.17497400  | 0.39915000  |
| C | 0.82240500  | 0.26806900  | -0.04666300 |
| C | 1.67652600  | -0.82151200 | 0.17331700  |
| C | 3.09645500  | -0.70111500 | 0.14510800  |
| C | 3.64843200  | 0.59145800  | -0.11197800 |
| C | 2.81152600  | 1.67771500  | -0.32554200 |
| C | 1.41932600  | 1.52953000  | -0.29838100 |
| H | -0.65760500 | -1.91690300 | -0.77981000 |
| H | -3.09014600 | -2.17156800 | -0.73203700 |
| H | -3.47815800 | 1.86583700  | 0.76866900  |
| H | -1.04534600 | 2.10708500  | 0.74050600  |
| H | 1.25140300  | -1.79428800 | 0.40163400  |
| H | 4.72921100  | 0.71102700  | -0.13776400 |
| H | 3.23620200  | 2.65754700  | -0.52984400 |
| H | 0.78818600  | 2.38771900  | -0.50272400 |
| C | -4.89200000 | -0.31535200 | 0.04035900  |
| C | 3.92599800  | -1.81601100 | 0.37531700  |



|   |             |             |             |
|---|-------------|-------------|-------------|
| H | 3.50730400  | -2.79674200 | 0.57451800  |
| H | 5.00757400  | -1.71946600 | 0.36002500  |
| H | -5.36908700 | -1.23829100 | -0.27104600 |
| H | -5.53554600 | 0.49572200  | 0.36334300  |

$E_{\parallel} = 0.0075$  a.u.

0 3

|   |             |             |             |
|---|-------------|-------------|-------------|
| C | -0.64467900 | 0.11387500  | -0.01811900 |
| C | -1.26755500 | -1.10167900 | -0.39894200 |
| C | -2.64080400 | -1.24591900 | -0.38582200 |
| C | -3.50094800 | -0.17575200 | 0.02117600  |
| C | -2.86282500 | 1.04566000  | 0.40972900  |
| C | -1.48871500 | 1.17984000  | 0.38445800  |
| C | 0.82050700  | 0.26678600  | -0.04293900 |
| C | 1.67896600  | -0.82284600 | 0.16875800  |
| C | 3.09852000  | -0.70046900 | 0.13883200  |
| C | 3.65002100  | 0.59434700  | -0.11011800 |
| C | 2.81038700  | 1.68064000  | -0.31491900 |
| C | 1.41866400  | 1.53038600  | -0.28719900 |
| H | -0.65813600 | -1.93067900 | -0.74731400 |
| H | -3.08952100 | -2.18289000 | -0.70334200 |
| H | -3.48143300 | 1.87583700  | 0.73827300  |
| H | -1.05050000 | 2.11720100  | 0.71470400  |

|   |             |             |             |
|---|-------------|-------------|-------------|
| H | 1.25614300  | -1.79781700 | 0.39146400  |
| H | 4.73107000  | 0.71489300  | -0.13678300 |
| H | 3.23237800  | 2.66306100  | -0.51352200 |
| H | 0.78718300  | 2.38955200  | -0.48564600 |
| C | -4.89274000 | -0.31465500 | 0.03538700  |
| C | 3.93029200  | -1.81580100 | 0.36048500  |
| H | 3.51390700  | -2.79875000 | 0.55362800  |
| H | 5.01204000  | -1.71649000 | 0.34451700  |
| H | -5.36998000 | -1.24138400 | -0.26441300 |
| H | -5.53769700 | 0.50099600  | 0.34384000  |

$E_{\parallel} = 0.0090$  a.u.

0.3

|   |             |             |             |
|---|-------------|-------------|-------------|
| C | -0.64475300 | 0.11217700  | -0.01498500 |
| C | -1.26804500 | -1.11030600 | -0.37680900 |
| C | -2.64085800 | -1.25370100 | -0.36632100 |
| C | -3.50270100 | -0.17617400 | 0.01952300  |
| C | -2.86507600 | 1.05172200  | 0.39023600  |
| C | -1.49144000 | 1.18513100  | 0.36707200  |
| C | 0.81846900  | 0.26523700  | -0.03919600 |
| C | 1.68175100  | -0.82466400 | 0.16274100  |
| C | 3.10087300  | -0.69986000 | 0.13161900  |
| C | 3.65184200  | 0.59763200  | -0.10747100 |
| C | 2.80911700  | 1.68399400  | -0.30208900 |

|   |             |             |             |
|---|-------------|-------------|-------------|
| C | 1.41794000  | 1.53145800  | -0.27394600 |
| H | -0.65925200 | -1.94603000 | -0.71004700 |
| H | -3.08912700 | -2.19541000 | -0.66991300 |
| H | -3.48471300 | 1.88706800  | 0.70311600  |
| H | -1.05604300 | 2.12831100  | 0.68420700  |
| H | 1.26171800  | -1.80228200 | 0.37843000  |
| H | 4.73316800  | 0.71945700  | -0.13479100 |
| H | 3.22827700  | 2.66931100  | -0.49361600 |
| H | 0.78629800  | 2.39196000  | -0.46520800 |
| C | -4.89370200 | -0.31383000 | 0.03039300  |
| C | 3.93527700  | -1.81553600 | 0.34340100  |
| H | 3.52158700  | -2.80109900 | 0.52912400  |
| H | 5.01720200  | -1.71305900 | 0.32705500  |
| H | -5.37123100 | -1.24481900 | -0.25567900 |
| H | -5.54004400 | 0.50691000  | 0.32231200  |

$E_{||} = 0.0115$  a.u.

0 3

|   |             |             |             |
|---|-------------|-------------|-------------|
| C | -0.64472800 | 0.10884900  | -0.00918500 |
| C | -1.26957000 | -1.12180600 | -0.34842200 |
| C | -2.64172200 | -1.26323700 | -0.34282300 |
| C | -3.50550900 | -0.17661000 | 0.01704600  |
| C | -2.86792600 | 1.05862900  | 0.36720000  |
| C | -1.49510800 | 1.19064400  | 0.34713800  |

|   |             |             |             |
|---|-------------|-------------|-------------|
| C | 0.81455900  | 0.26193500  | -0.03314100 |
| C | 1.68656400  | -0.82764000 | 0.15683700  |
| C | 3.10482800  | -0.69842100 | 0.12218400  |
| C | 3.65477500  | 0.60290700  | -0.10589400 |
| C | 2.80616800  | 1.68840600  | -0.28753900 |
| C | 1.41607900  | 1.53182800  | -0.25731200 |
| H | -0.66198000 | -1.96578200 | -0.66291100 |
| H | -3.09010200 | -2.20962500 | -0.63096200 |
| H | -3.48875200 | 1.89999100  | 0.66068600  |
| H | -1.06340000 | 2.14088800  | 0.64779800  |
| H | 1.27112800  | -1.80892500 | 0.36395500  |
| H | 4.73663300  | 0.72691700  | -0.13552700 |
| H | 3.22018000  | 2.67780300  | -0.47169000 |
| H | 0.78354200  | 2.39357600  | -0.43896600 |
| C | -4.89527000 | -0.31173700 | 0.02213200  |
| C | 3.94468500  | -1.81308000 | 0.32165300  |
| H | 3.53648600  | -2.80247900 | 0.49945000  |
| H | 5.02691800  | -1.70442900 | 0.30374900  |
| H | -5.37422600 | -1.24683300 | -0.24854300 |
| H | -5.54338300 | 0.51491000  | 0.29372600  |

$E_{||} = 0.0130$  a.u.

0 3

|   |             |            |             |
|---|-------------|------------|-------------|
| C | -0.64467400 | 0.10814000 | -0.00547600 |
|---|-------------|------------|-------------|

|   |             |             |             |
|---|-------------|-------------|-------------|
| C | -1.27029100 | -1.13569300 | -0.30097000 |
| C | -2.64157800 | -1.27727400 | -0.29852900 |
| C | -3.50901900 | -0.17769400 | 0.01382100  |
| C | -2.87305200 | 1.07054600  | 0.32143200  |
| C | -1.50103800 | 1.20203400  | 0.30539700  |
| C | 0.81178500  | 0.26100500  | -0.02679400 |
| C | 1.69058400  | -0.83117800 | 0.13910000  |
| C | 3.10804600  | -0.69894500 | 0.10610700  |
| C | 3.65893400  | 0.60737000  | -0.09576600 |
| C | 2.80639600  | 1.69454400  | -0.25466000 |
| C | 1.41726000  | 1.53575100  | -0.22570400 |
| H | -0.66346200 | -1.99283900 | -0.57879000 |
| H | -3.08827600 | -2.23436100 | -0.55176600 |
| H | -3.49610300 | 1.92191600  | 0.57912300  |
| H | -1.07544400 | 2.16394200  | 0.57508100  |
| H | 1.27947200  | -1.81817400 | 0.32576600  |
| H | 4.74118400  | 0.73267100  | -0.12461900 |
| H | 3.21717800  | 2.68902700  | -0.41957400 |
| H | 0.78690900  | 2.40220100  | -0.39005200 |
| C | -4.89743200 | -0.31261400 | 0.01487300  |
| C | 3.95121400  | -1.81566200 | 0.28240500  |
| H | 3.54647300  | -2.80995000 | 0.44029300  |
| H | 5.03364300  | -1.70271000 | 0.26625700  |
| H | -5.37601800 | -1.25708200 | -0.22294800 |
| H | -5.54837200 | 0.52337900  | 0.24980700  |

$E_{\parallel} = 0.0145$  a.u.

0 3

|   |             |             |             |
|---|-------------|-------------|-------------|
| C | -0.64468200 | 0.10624700  | -0.00196000 |
| C | -1.27217600 | -1.14488300 | -0.27055000 |
| C | -2.64287700 | -1.28546400 | -0.27120600 |
| C | -3.51191400 | -0.17799400 | 0.01139200  |
| C | -2.87600100 | 1.07702300  | 0.29368500  |
| C | -1.50458000 | 1.20747100  | 0.28054900  |
| C | 0.80913400  | 0.25880500  | -0.02219800 |
| C | 1.69456200  | -0.83417600 | 0.12889300  |
| C | 3.11103700  | -0.69862300 | 0.09573200  |
| C | 3.66231400  | 0.61142100  | -0.09042400 |
| C | 2.80532300  | 1.69863500  | -0.23477700 |
| C | 1.41714400  | 1.53706400  | -0.20566900 |
| H | -0.66663500 | -2.01006500 | -0.52497100 |
| H | -3.08937500 | -2.24789100 | -0.50359600 |
| H | -3.49987400 | 1.93413900  | 0.52939700  |
| H | -1.08247600 | 2.17603300  | 0.53059100  |
| H | 1.28740600  | -1.82499000 | 0.30278700  |
| H | 4.74493200  | 0.73798300  | -0.12023400 |
| H | 3.21251400  | 2.69673900  | -0.38846700 |
| H | 0.78721300  | 2.40575100  | -0.35846900 |
| C | -4.89939000 | -0.31151700 | 0.00868300  |
| C | 3.95841700  | -1.81513200 | 0.25714400  |

|   |             |             |             |
|---|-------------|-------------|-------------|
| H | 3.55833800  | -2.81321800 | 0.40309100  |
| H | 5.04099500  | -1.69682400 | 0.24146300  |
| H | -5.37911600 | -1.26052700 | -0.20905800 |
| H | -5.55178300 | 0.52959700  | 0.22170700  |

$E_{||} = 0.0160$  a.u.

0.3

|   |             |             |             |
|---|-------------|-------------|-------------|
| C | -0.68989000 | -0.10505000 | 0.07135900  |
| C | -1.41105100 | -1.24357800 | -0.36553500 |
| C | -2.81459300 | -1.25538000 | -0.39471600 |
| C | -3.57902400 | -0.12465100 | 0.02992800  |
| C | -2.85389000 | 1.00068900  | 0.52289200  |
| C | -1.45848200 | 0.99832200  | 0.53946900  |
| C | 0.83313700  | 0.04967300  | 0.01500200  |
| C | 1.85627100  | -0.92169600 | 0.20884500  |
| C | 3.27404700  | -0.60381000 | 0.13684900  |
| C | 3.61176600  | 0.74128600  | -0.21916100 |
| C | 2.62948500  | 1.68688800  | -0.44575800 |
| C | 1.27347500  | 1.35309300  | -0.34219000 |
| H | -0.88694600 | -2.11789200 | -0.73981200 |
| H | -3.34039000 | -2.13264700 | -0.76561200 |
| H | -3.39881400 | 1.87202200  | 0.88129600  |
| H | -0.96422800 | 1.87394200  | 0.94792900  |
| H | 1.56650000  | -1.93716800 | 0.47160800  |

|   |             |             |             |
|---|-------------|-------------|-------------|
| H | 4.67157100  | 0.99429500  | -0.29639300 |
| H | 2.89665400  | 2.70358600  | -0.72919500 |
| H | 0.53259600  | 2.10923000  | -0.57230900 |
| C | -5.00350500 | -0.08133600 | -0.08801100 |
| C | 4.40022300  | -1.44201700 | 0.36014300  |
| H | 4.28158600  | -2.48843100 | 0.63819100  |
| H | 5.41793600  | -1.08017500 | 0.27006600  |
| H | -5.59700400 | -0.90985700 | -0.49439000 |
| H | -5.58728000 | 0.79849400  | 0.21391700  |

$E_{\perp} = 0.0015$  a.u.

0 3

|   |             |             |             |
|---|-------------|-------------|-------------|
| C | -0.64215100 | 0.11732800  | -0.01932200 |
| C | -1.26562200 | -1.07910500 | -0.44880300 |
| C | -2.63965100 | -1.22578300 | -0.43154000 |
| C | -3.49752500 | -0.17581300 | 0.02462800  |
| C | -2.85760000 | 1.02771100  | 0.45846800  |
| C | -1.48241600 | 1.16359200  | 0.43209700  |
| C | 0.82745200  | 0.27169400  | -0.04684000 |
| C | 1.67231700  | -0.81864200 | 0.18725700  |
| C | 3.09278600  | -0.70161900 | 0.15782000  |
| C | 3.64329100  | 0.58680800  | -0.11911100 |
| C | 2.81149100  | 1.67280300  | -0.34907400 |
| C | 1.41854800  | 1.52969100  | -0.31585300 |



|   |             |             |             |
|---|-------------|-------------|-------------|
| H | -0.65352800 | -1.88828000 | -0.83536600 |
| H | -3.08767700 | -2.14940100 | -0.78838500 |
| H | -3.47395900 | 1.84688100  | 0.81971500  |
| H | -1.03615600 | 2.08667500  | 0.78997300  |
| H | 1.24431100  | -1.78854200 | 0.42391700  |
| H | 4.72283300  | 0.70408500  | -0.15373300 |
| H | 3.24243600  | 2.64448100  | -0.57379800 |
| H | 0.78809500  | 2.38485400  | -0.53618900 |
| C | -4.89164600 | -0.31682900 | 0.03958300  |
| C | 3.91994500  | -1.81513600 | 0.39800400  |
| H | 3.49822600  | -2.79353900 | 0.60242300  |
| H | 5.00069900  | -1.72640700 | 0.36994500  |
| H | -5.36717100 | -1.22980700 | -0.30275800 |
| H | -5.53343400 | 0.48879600  | 0.38037000  |

$E_{\perp} = 0.0030$  a.u.

0 3

|   |             |             |             |
|---|-------------|-------------|-------------|
| C | -0.64208000 | 0.11546100  | -0.00972200 |
| C | -1.26403600 | -1.08096200 | -0.44144800 |
| C | -2.63816100 | -1.22743000 | -0.42928300 |
| C | -3.49762900 | -0.17715400 | 0.02322900  |
| C | -2.85914800 | 1.02590900  | 0.46049700  |
| C | -1.48381600 | 1.16166400  | 0.43903600  |

|   |             |             |             |
|---|-------------|-------------|-------------|
| C | 0.82729200  | 0.27183600  | -0.03822400 |
| C | 1.67394000  | -0.81703900 | 0.19607300  |
| C | 3.09417900  | -0.69940100 | 0.15857800  |
| C | 3.64250800  | 0.58853100  | -0.12494900 |
| C | 2.80892700  | 1.67321100  | -0.35475100 |
| C | 1.41623500  | 1.52941800  | -0.31390200 |
| H | -0.65116200 | -1.88824700 | -0.83058100 |
| H | -3.08499900 | -2.14880400 | -0.79314600 |
| H | -3.47721500 | 1.84710300  | 0.81442000  |
| H | -1.03861900 | 2.08656100  | 0.79379800  |
| H | 1.24745600  | -1.78765800 | 0.43280900  |
| H | 4.72166900  | 0.70512400  | -0.17145800 |
| H | 3.23799800  | 2.64298000  | -0.59078200 |
| H | 0.78436600  | 2.38210000  | -0.53965800 |
| C | -4.89209500 | -0.31598300 | 0.02728200  |
| C | 3.92322700  | -1.81284100 | 0.39285200  |
| H | 3.50288100  | -2.79281500 | 0.59280000  |
| H | 5.00359700  | -1.72562100 | 0.34913400  |
| H | -5.36671700 | -1.22521700 | -0.32596500 |
| H | -5.53532100 | 0.49317200  | 0.35701800  |

$E_{\perp} = 0.0045$  a.u.

0 3

|   |             |             |             |
|---|-------------|-------------|-------------|
| C | -0.64203200 | 0.11370300  | -0.00039800 |
| C | -1.26248800 | -1.08190400 | -0.43644500 |
| C | -2.63677100 | -1.22806400 | -0.42950300 |
| C | -3.49758700 | -0.17844500 | 0.02194200  |
| C | -2.86046500 | 1.02310300  | 0.46530100  |
| C | -1.48496400 | 1.15877600  | 0.44856300  |
| C | 0.82718200  | 0.27200200  | -0.03008400 |
| C | 1.67546400  | -0.81521400 | 0.20559900  |
| C | 3.09544600  | -0.69703800 | 0.16027700  |
| C | 3.64161500  | 0.58993300  | -0.13160100 |
| C | 2.80634100  | 1.67319500  | -0.36218000 |
| C | 1.41390400  | 1.52894400  | -0.31336600 |
| H | -0.64878100 | -1.88645300 | -0.82984000 |
| H | -3.08253700 | -2.14627000 | -0.80243300 |
| H | -3.48004700 | 1.84557500  | 0.81382300  |
| H | -1.04049700 | 2.08463500  | 0.80205100  |
| H | 1.25016600  | -1.78625900 | 0.44310000  |
| H | 4.72026300  | 0.70561100  | -0.19047600 |
| H | 3.23355400  | 2.64065800  | -0.61054800 |
| H | 0.78050800  | 2.37887100  | -0.54514800 |
| C | -4.89241000 | -0.31499100 | 0.01508000  |
| C | 3.92627700  | -1.81026800 | 0.38995200  |

|   |             |             |             |
|---|-------------|-------------|-------------|
| H | 3.50701600  | -2.79153600 | 0.58604400  |
| H | 5.00601900  | -1.72470300 | 0.33016500  |
| H | -5.36599000 | -1.21954100 | -0.35123100 |
| H | -5.53674100 | 0.49702200  | 0.33567500  |

$E_{\perp} = 0.0060$  a.u.

0 3

|   |             |             |             |
|---|-------------|-------------|-------------|
| C | -0.64208500 | 0.11307500  | 0.00259700  |
| C | -1.26218500 | -1.08084000 | -0.43849800 |
| C | -2.63658800 | -1.22681400 | -0.43307800 |
| C | -3.49746100 | -0.17880600 | 0.02195300  |
| C | -2.86062500 | 1.02103500  | 0.47018200  |
| C | -1.48504200 | 1.15677000  | 0.45450200  |
| C | 0.82720600  | 0.27195800  | -0.02751600 |
| C | 1.67592500  | -0.81456400 | 0.20951400  |
| C | 3.09582600  | -0.69616200 | 0.16180500  |
| C | 3.64123300  | 0.59010200  | -0.13460700 |
| C | 2.80545000  | 1.67259900  | -0.36713900 |
| C | 1.41306900  | 1.52827300  | -0.31528600 |
| H | -0.64842600 | -1.88333500 | -0.83597500 |
| H | -3.08216700 | -2.14287600 | -0.81142100 |
| H | -3.48059900 | 1.84282500  | 0.81976500  |
| H | -1.04039200 | 2.08194800  | 0.80967300  |

|   |             |             |             |
|---|-------------|-------------|-------------|
| H | 1.25090100  | -1.78546600 | 0.44821800  |
| H | 4.71969600  | 0.70544800  | -0.19756000 |
| H | 3.23205300  | 2.63888100  | -0.62102100 |
| H | 0.77905600  | 2.37693300  | -0.55005600 |
| C | -4.89248100 | -0.31466600 | 0.01197500  |
| C | 3.92733100  | -1.80884200 | 0.39209200  |
| H | 3.50834900  | -2.79019500 | 0.58850700  |
| H | 5.00681900  | -1.72368700 | 0.32736100  |
| H | -5.36586700 | -1.21655800 | -0.36100900 |
| H | -5.53685700 | 0.49738200  | 0.33254700  |

$E_{\perp} = 0.0075$  a.u.

0 3

|   |             |             |             |
|---|-------------|-------------|-------------|
| C | -0.64200800 | 0.11131900  | 0.01062000  |
| C | -1.26097600 | -1.07996600 | -0.43881300 |
| C | -2.63558600 | -1.22554500 | -0.43777300 |
| C | -3.49724400 | -0.17980500 | 0.02102000  |
| C | -2.86131900 | 1.01701700  | 0.47852500  |
| C | -1.48551200 | 1.15266700  | 0.46656200  |
| C | 0.82709900  | 0.27196700  | -0.02076800 |
| C | 1.67716900  | -0.81281800 | 0.21885000  |
| C | 3.09681700  | -0.69391500 | 0.16428900  |
| C | 3.64023700  | 0.59108000  | -0.14129200 |

|   |             |             |             |
|---|-------------|-------------|-------------|
| C | 2.80290000  | 1.67195200  | -0.37633700 |
| C | 1.41075700  | 1.52722800  | -0.31718600 |
| H | -0.64659000 | -1.87863100 | -0.84301300 |
| H | -3.08035400 | -2.13737000 | -0.82698500 |
| H | -3.48232500 | 1.83860700  | 0.82705200  |
| H | -1.04108100 | 2.07738800  | 0.82361800  |
| H | 1.25313500  | -1.78376700 | 0.45959000  |
| H | 4.71813200  | 0.70556800  | -0.21468600 |
| H | 3.22767200  | 2.63576800  | -0.64221700 |
| H | 0.77508900  | 2.37304000  | -0.55790000 |
| C | -4.89257600 | -0.31364200 | 0.00213000  |
| C | 3.92996000  | -1.80588700 | 0.39306700  |
| H | 3.51193400  | -2.78795600 | 0.58828300  |
| H | 5.00869100  | -1.72214700 | 0.31489900  |
| H | -5.36514300 | -1.21002400 | -0.38482300 |
| H | -5.53747400 | 0.49961300  | 0.31881600  |

$E_{\perp} = 0.0090$  a.u.

0 3

|   |             |             |             |
|---|-------------|-------------|-------------|
| C | -0.64200800 | 0.11011900  | 0.01580600  |
| C | -1.26027900 | -1.07820200 | -0.44217200 |
| C | -2.63504000 | -1.22337800 | -0.44410500 |
| C | -3.49699300 | -0.18048800 | 0.02060400  |

|   |             |             |             |
|---|-------------|-------------|-------------|
| C | -2.86156100 | 1.01292700  | 0.48768100  |
| C | -1.48561200 | 1.14861800  | 0.47784400  |
| C | 0.82711100  | 0.27196900  | -0.01649900 |
| C | 1.67795400  | -0.81141500 | 0.22606600  |
| C | 3.09747500  | -0.69223000 | 0.16700100  |
| C | 3.63941800  | 0.59147200  | -0.14673800 |
| C | 2.80111000  | 1.67091200  | -0.38497100 |
| C | 1.40912100  | 1.52620700  | -0.32034600 |
| H | -0.64543500 | -1.87296800 | -0.85337300 |
| H | -3.07956100 | -2.13106800 | -0.84311600 |
| H | -3.48319500 | 1.83339900  | 0.83799000  |
| H | -1.04092300 | 2.07197200  | 0.83847000  |
| H | 1.25428400  | -1.78204100 | 0.46916300  |
| H | 4.71685500  | 0.70516400  | -0.22769200 |
| H | 3.22470700  | 2.63251700  | -0.66049400 |
| H | 0.77220500  | 2.36960600  | -0.56625800 |
| C | -4.89257500 | -0.31270000 | -0.00421700 |
| C | 3.93175400  | -1.80328700 | 0.39661100  |
| H | 3.51432300  | -2.78564900 | 0.59195400  |
| H | 5.00986600  | -1.72067400 | 0.30900900  |
| H | -5.36473500 | -1.20398200 | -0.40325000 |
| H | -5.53764300 | 0.50058800  | 0.31221500  |

| Field(a.u) | Molecular Orbital                                                                 |                                                                                    |
|------------|-----------------------------------------------------------------------------------|------------------------------------------------------------------------------------|
|            | HOMO                                                                              | LUMO                                                                               |
| 0.00       | 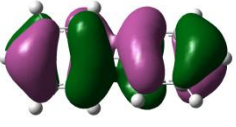 |  |
| 0.0015     |  |  |
| 0.0030     |  |  |

FIG. S1. Molecular orbital picture of the biphenyl; when, the electric field applied perpendicular to the molecular plane.



| Field(a.u) | HOMO                                                                                | SOMO                                                                                 | LUMO                                                                                  |
|------------|-------------------------------------------------------------------------------------|--------------------------------------------------------------------------------------|---------------------------------------------------------------------------------------|
| 0.00       | 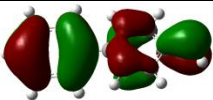   |    |    |
| 0.0015     |    |    |    |
| 0.0030     |    |    |    |
| 0.0045     |    |    |    |
| 0.0060     |    |    |    |
| 0.0075     |   |   |   |
| 0.0090     |  |  |  |
| 0.0115     |  |  |  |
| 0.0130     |  |  |  |
| 0.0145     |  |  |  |

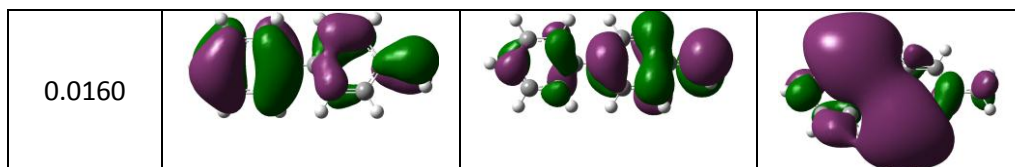

FIG. S2. Molecular orbital picture of the monoradical; when, the electric field applied perpendicular to the molecular plane.

| Field(a.u) | HOMO | SOMO1 | SOMO2 | LUMO |
|------------|------|-------|-------|------|
| 0.00       |      |       |       |      |
| 0.0015     |      |       |       |      |
| 0.0030     |      |       |       |      |
| 0.0045     |      |       |       |      |
| 0.0060     |      |       |       |      |
| 0.0075     |      |       |       |      |
| 0.0090     |      |       |       |      |

FIG. S3. Molecular orbital picture of the diradical; when, the electric field applied perpendicular to the molecular plane.

TABLE S1. HOMO-LUMO Gap of the Molecules Under Different Electric Field ( $E_{\parallel}$ ).

| Field $\times 10^{-4}$ a.u.<br>( $E_{\parallel}$ ) | HOMO-LUMO Gap (eV) |             |           |
|----------------------------------------------------|--------------------|-------------|-----------|
|                                                    | Biphenyl           | Monoradical | Diradical |
| 0                                                  | 5.27               | 4.43        | 4.17      |
| 15                                                 | 5.27               | 3.09        | 4.17      |
| 30                                                 | 5.29               | 4.16        | 4.17      |
| 45                                                 | ----               | 4.16        | 4.17      |
| 60                                                 | ----               | 4.16        | 4.17      |
| 75                                                 | ----               | 4.16        | 4.17      |
| 90                                                 | ----               | 4.15        | 4.16      |
| 115                                                | ----               | 4.12        | ----      |
| 130                                                | ----               | 4.10        | ----      |
| 145                                                | ----               | 4.05        | ----      |
| 160                                                | ----               | 3.98        | ----      |
